# Supplementary material for: Dihydroartemisinin inhibits liver cancer cell migration and invasion by reducing ATP synthase production through CaMKK2/NCLX
Source: PubMed Central journal article supplement — Oncol Lett. 2023 Nov 2;26(6):540. doi: 10.3892/ol.2023.14127 (PMC10660190; doi:10.3892/ol.2023.14127), 2023-11-02

Figure S1. Effects of DHA treatment, CaMKK2-OE and NCLX siRNA on the proliferation of liver cancer cells. EdU (A) staining and (B) quantification of HepG2 cells treated with DHA and transfected with CaMKK2-OE and/or NCLX siRNA. EdU (C) staining and (D) quantification of HuH-7 cells treated with DHA and transfected with CaMKK2-OE and/or NCLX siRNA. Scale bar, 50  $\mu$ m. All data are presented as the mean  $\pm$  standard deviation (n=3). Data were analyzed using one-way analysis of variance followed by Bonferroni post hoc test. \*\*P<0.01; \*\*\*P<0.001. NCLX, mitochondrial sodium/calcium exchanger protein; DHA, dihydroartemisinin; CaMKK2, calcium/calmodulin-dependent protein kinase kinase 2; ns, not significant; OE, overexpression; NC, negative control; siRNA, small interfering RNA.

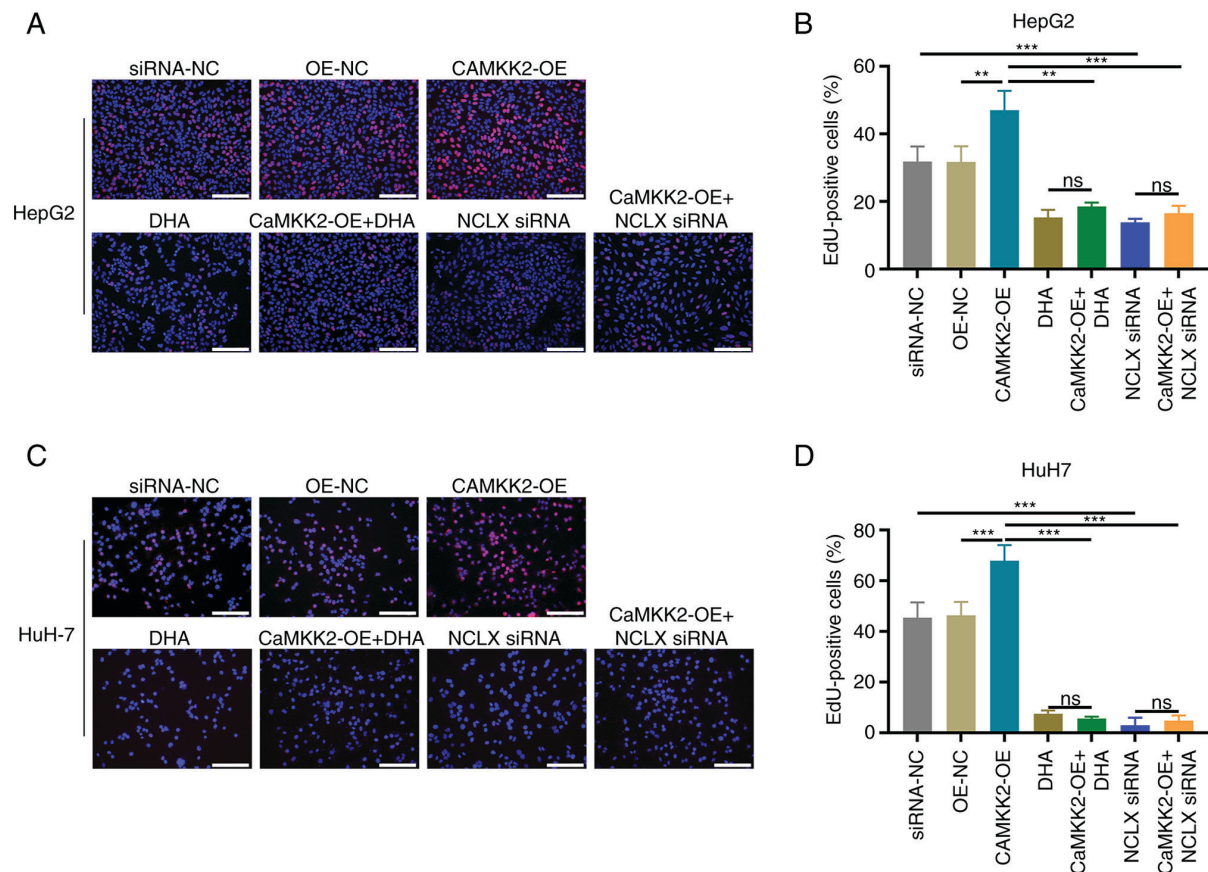

Supplement: Supplementary_Data.pdf [file Supplementary_Data.pdf]
